# Supplementary material
Source: PubMed Central journal article supplement (PMC6782058)
Supplement: NIHMS1016815-supplement-Supplementary_Table_1.pdf [file NIHMS1016815-supplement-Supplementary_Table_1.pdf]

Supplementary Table 1: Breakdown of costs, cost per person tested and testing positive of alternative scenarios, by category (2017 USD)

| Cost category (%)                | Local team & Serial testing, Mobile | Local team & Parallel testing, Mobile | Relocating team & Serial testing, Mobile | Relocating team & Parallel testing, Mobile (Basecase) | Local team & Serial testing, Home-based | Local team & Parallel testing, Home-based | Relocating team & Serial Testing, Home-based | Relocating team & Parallel testing, Home-based (Basecase) |
|----------------------------------|-------------------------------------|---------------------------------------|------------------------------------------|-------------------------------------------------------|-----------------------------------------|-------------------------------------------|----------------------------------------------|-----------------------------------------------------------|
| Labor                            | 217,050 (62)                        | 217,050 (59)                          | 267,921 (64)                             | 267,921 (61)                                          | 355,085 (67)                            | 355,085 (65)                              | 435,835 (62)                                 | 435,835 (66)                                              |
| Equipment & Supplies             | 46,356 (13)                         | 46,356 (13)                           | 47,329 (11)                              | 47,329 (11)                                           | 53,391 (10)                             | 53,391 (10)                               | 55,055 (9)                                   | 55,055(8)                                                 |
| Facilities & Administration      | 13,736 (4)                          | 13,736 (4)                            | 13,736 (3)                               | 13,736 (3)                                            | 23,481 (4)                              | 23,481(4)                                 | 23,481 (4)                                   | 23,481(4)                                                 |
| Events & Travel                  | 36,758 (10)                         | 36,758 (10)                           | 53,353 (13)                              | 53,353 (12)                                           | 62,834 (12)                             | 62,834(11)                                | 91,200 (14)                                  | 91,200(14)                                                |
| Per client materials             | 36,891 (11)                         | 56,087 (15)                           | 36,891 (9)                               | 56,087 (13)                                           | 35,726 (7)                              | 54,315(10)                                | 35,726 (6)                                   | 54,315(8)                                                 |
| Total                            | 350,792 (100)                       | 369,987 (100)                         | 419,231(100)                             | 438,426 (100)                                         | 530,517 (100)                           | 549,106(100)                              | 641,297 (100)                                | 659,886 (100)                                             |
| Cost per person Tested           | 27                                  | 29                                    | 33                                       | 34                                                    | 43                                      | 44                                        | 52                                           | 53                                                        |
| Cost per person testing positive | 458                                 | 483                                   | 547                                      | 572                                                   | 610                                     | 631                                       | 737                                          | 758                                                       |
